# Supplementary material for: Safflower yellow reduces DEN-induced hepatocellular carcinoma by enhancing liver immune infiltration through promotion of collagen degradation and modulation of gut microbiota
Source: Royal Society of Chemistry journal article supplement (doi:10.1039/d1fo01321a), 2021-01-01

**FigS1**

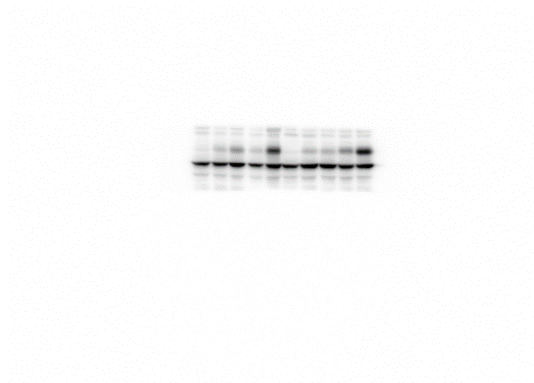

**FigS2**

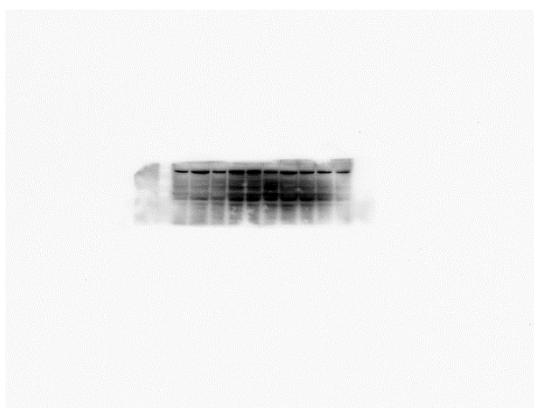

**FigS3**

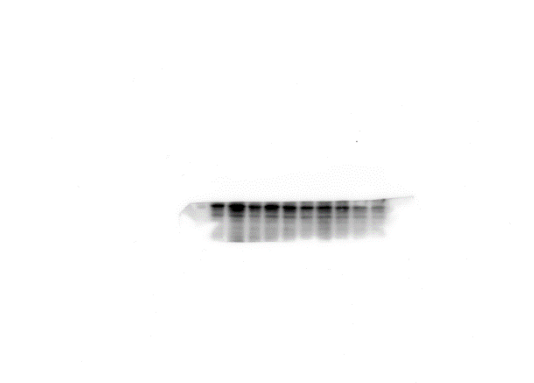

**FigS4**

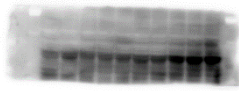

**FigS5**

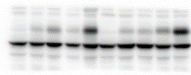

**FigS6**

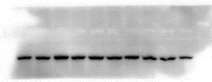

**FigS7**

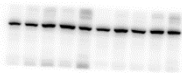

**FigS8**

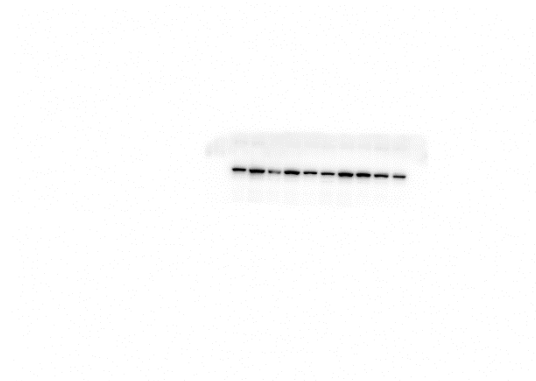

**FigS9**

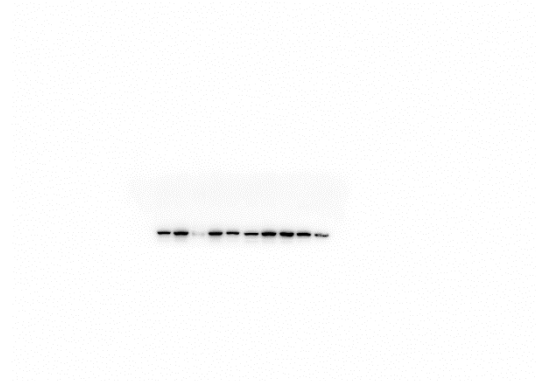

**FigS10**

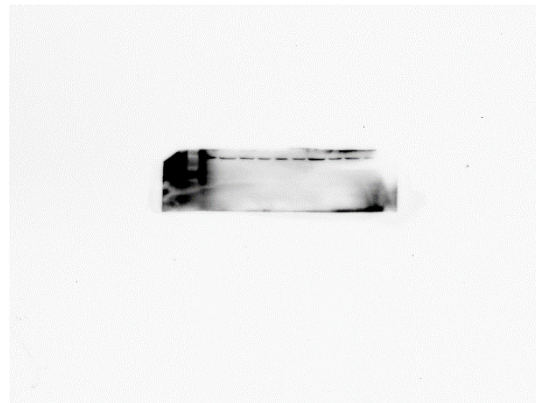

**FigS11**

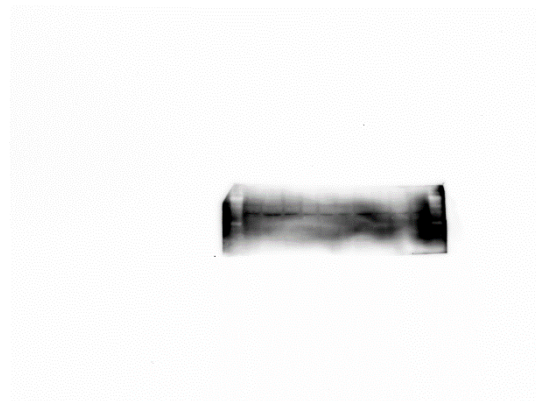

**FigS12**

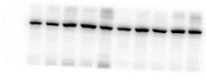

**FigS13**

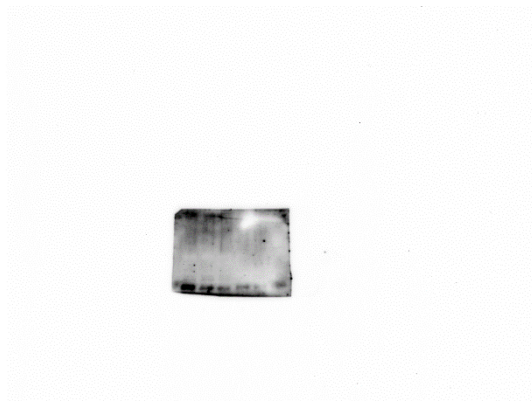

**FigS14**

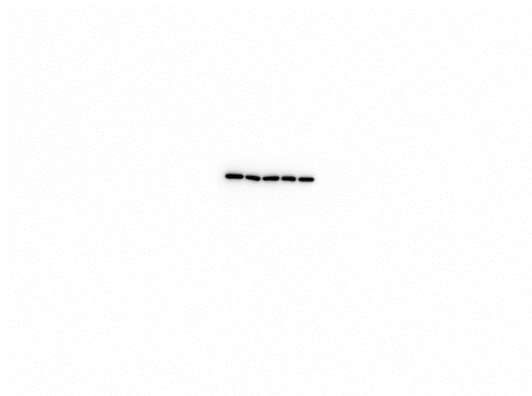

**FigS15**

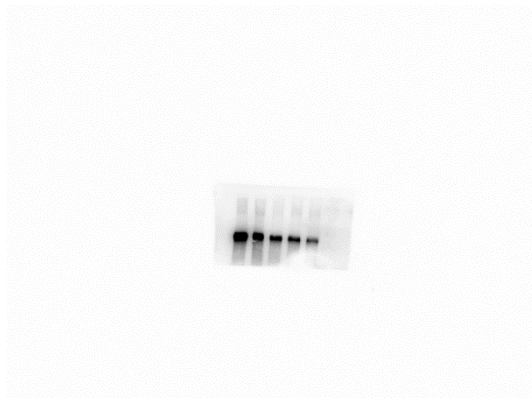

**FigS16**

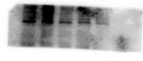

**FigS17**

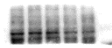

**FigS18**

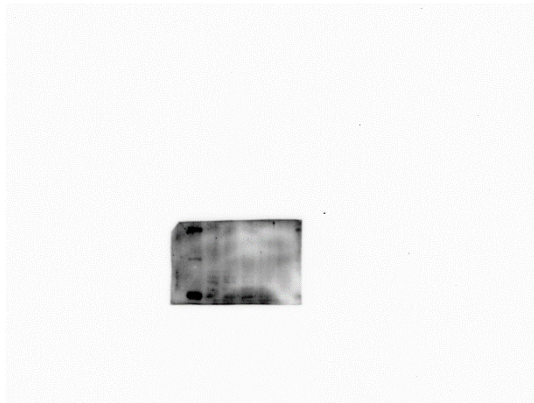

**FigS19**

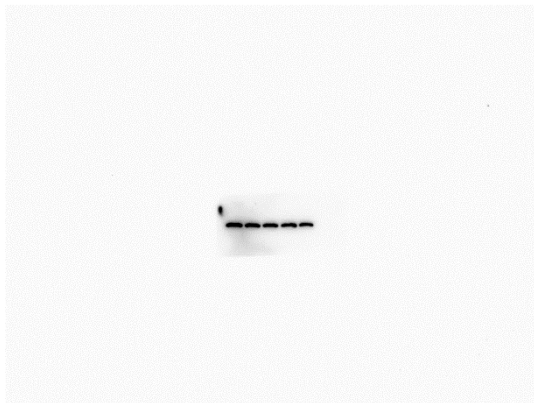

**FigS20**

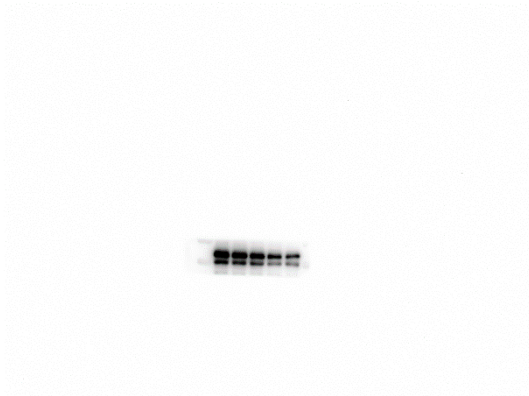

Supplement: d1fo01321a1.pdf [file d1fo01321a1.pdf]
